# Supplementary material
Source: MDPI journal article supplement (https://www.mdpi.com/1424-2818/13/8/347)
Supplement: s1 [file s1]

Archive with 3 entries (3 files):
- suplementary material 1 Tables S1-S6.xlsx
- suplementary material 2 .pdf
- suplementary material 3.pdf
