# Supplementary material
Source: MDPI journal article supplement (https://www.mdpi.com/1424-2818/13/8/347)
Supplement: s1 [file s1 › suplementary material 1 Tables S1-S6.xlsx]

## Sheet: Table S1
Table S.1. Sampling localities from Usumacinta river basin
	mtCOX1	mtCytb	Micros	Locality	Distance to the sea (Km)	Coordinates		Altitude (msnm)
	n= 72	n= 34	n= 81
	3	-	3	Tzendales river	520.05	16.2826	-90.9465		184
Rainforest	6	5	10	Lacantun river	508.67	16.3427	-90.7866		130
	6	4	6	Chajul	553.03	16.1005	-91.0873		180
	2	1	4	Benemerito de las Americas	433.25	16.614	-90.6591		119
	6	2	5	Emiliano Zapata	87.27	17.7453	-91.7653		8
	4	3	8	San Pedro river	188.71	17.7794	-91.1472		37
Floodplain	7	1	5	Chacamax river	136.76	17.4793	-91.9752		70
	2	2	5	Jonuta	99.31	18.1312	-92.1917		4
	1	1	-	Catazaja lagoon	144.05	17.7366	-92.0221		68
	9	1	6	Canitzan lagoon	280.12	17.5894	-91.3903		14
River delta	13	-	-	Salsipuedes	13.08	18.4072	-92.6492		2
	5	4	6	Palizada river	49.72	18.4307	-91.8327		-1
	3	5	11	Pom lagoon	73.37	18.595	-92.2081		-3
	1	1	3	Terminos lagoon	24.24	18.557	-91.7916		-1
	4	4	9	Sea	0	18.6271	-91.8347		0
GenBank Accession no.	MZ396465- MZ396536	MZ512145- MZ512178

## Sheet: Table S2
Table S2. Eleven microsatellite loci used in determining genetic variation among the Centropomus undecimalis samples from thirteen sampling localities along the Usumacinta river basin.
		Primer sequence (5´- 3´)			Fragment size range (Seyoum et al., 2005)
Locus name	Label	Forward Reverse		Repeat		Allele range
Cun02	FAM	AGCCACGCATGTTCATATTT	CTAAGCCATGATTGGACAGG	(TG)9	255–259	255-286
Cun04A	HEX	AATCGGGCTGGATGCTGCCTG	AAATAGGAGCCCGAGGATTA	(AC)9	210–216	209-219
Cun10A	FAM	CCCCAAGGATCGTCTATCTC	TAACATTTCACACGGTGCTG	(CA)18	159–219	163-227
Cun20	FAM	AGTGCAGTCATGTGTTTGGA	GGTAAAATCCTCCTGCTCCT	(AC)9	105–123	102-134
Cun21A	HEX	TTACTTCCAGGTGTGCATGA	GGCTGAACTGCAAATAAGGA	(GT)13	99–101	92-110
Cun09	FAM	TGAGGCCTACAGGTGAGTGT	ACGGTGACGTGAGTCTGTTT	(TG)32	237–273	212-289
Cun14	HEX	GCCTGTCATCTCACTGGGTA	GTCTTTGATCTGCCCGTTTA	(TG)36	177–215	167-205
Cun 06	HEX	CGAAGCCTTGTCCTGATTTA	TGCAGCTTAACCTTCTCCAG	(CT)6(CA)6	135–137	131-149
Cun01	FAM	AAGTTCGCTCCCTCTCACTT	GATACACATTGCCCTCAAG	(AC)26	117–143	113-143
Cun21B	HEX	AGTTCAGCCTTTCCACCTCT	GGTTTACCAGCTGAAAGCAG	(CT)5 (RT)10 (GC) (GT)6	88–96	88-102
Cun 22	HEX	GAAAGTTAACGCCAAACAGC	AACCAAACCCCACCTGTAAT	(AC)33	170–204	172-210

## Sheet: Table S3
Table S3. Genotipyng of 9 Loci of Centropomus undecimalis, and Genbank accession numbers for the mtCox1 and mtCytb fragments.
Name	Cun20		Cun10A		Cun02		Cun21A		Cun04A		Cun01		Cun021B		Cun06		Cun14		GenBank Accession for mtCOX1 no.	GenBank Accession for mtCytb no.
T3595	105	125	171	187	256	258	100	100	0	0	125	125	90	94	140	140	175	183	MZ396465
T3596	105	127	163	179	256	260	100	100	211	215	123	123	90	96	138	138	173	179
T3597	121	129	181	193	256	256	100	100	209	215	125	137	90	98	138	138	179	185	MZ396466
T6257	106	106	181	191	261	261	100	106	209	215	125	125	92	96	139	139	177	177	MZ396468	MZ512149
T6260	106	122	0	0	0	0	100	100	0	0	125	139	0	0	0	0	0	0		MZ512150
T6263	126	130	193	203	257	259	100	100	211	215	123	125	90	92	137	139	175	179	MZ396470	MZ512151
T6264	106	122	175	193	257	257	100	100	209	215	135	139	90	96	137	139	179	181	MZ396473	MZ512152
T6265	108	110	181	193	261	261	100	100	213	217	125	137	90	98	139	139	177	187	MZ396469	MZ512153
T6334	0	0	0	0	0	0	0	0	0	0	125	125	96	98	139	139	175	179
ECOSC-TEJ 1319	0	0	163	179	256	260	100	100	0	0	113	125	92	92	138	140	179	183
T2745	123	125	173	181	256	260	100	100	209	217	125	125	90	98	138	138	173	179	MZ396472
T2582	0	0	173	183	256	262	100	100	0	0	125	139	92	96	138	138	173	175	MZ396467
T2702	123	125	173	181	258	262	100	100	209	217	123	125	90	98	140	144	173	179	MZ396471
ET3428	110	134	187	209	255	257	96	100	215	217	123	125	90	92	131	137	167	179	MZ396474
ET3429	106	108	183	183	259	259	96	100	211	215	139	139	90	92	131	137	175	179	MZ396475	MZ512145
ET3430	106	122	179	191	255	259	96	100	209	211	131	137	90	96	131	137	173	179	MZ396476	MZ512146
ET3434_	106	128	171	181	255	257	96	98	209	215	125	139	90	92	131	137	179	183	MZ396477
ET3435	106	108	177	189	255	255	100	104	215	215	125	139	90	98	133	137	175	177	MZ396478	MZ512147
ET3438	106	110	175	175	257	257	96	100	209	211	125	137	98	98	131	137	175	185	MZ396479	MZ512148
ET3450	106	122	171	177	255	257	96	100	209	211	121	139	90	90	131	137	175	175
ET3451	110	126	0	0	255	257	100	104	209	217	125	139	90	98	131	137	173	205	MZ396480	MZ512154
ET3452	106	108	169	171	259	259	96	100	213	215	121	125	92	94	131	137	175	187	MZ396481
ET3453	110	126	171	173	255	255	96	100	209	209	125	139	90	92	131	137	175	175
ET3467	122	126	169	189	257	257	96	100	209	217	125	139	90	92	131	137	171	179	MZ396498	MZ512160
ET3468	106	106	179	179	259	259	96	100	209	209	119	123	90	98	131	137	175	179	MZ396499
ET3469	106	106	171	171	259	259	96	100	209	219	125	125	92	96	131	137	179	181	MZ396500
ET3470	126	128	171	177	259	259	96	100	215	215	119	125	92	96	131	137	175	199	MZ396501	MZ512161
T6332	106	126	169	197	261	261	100	104	211	217	125	125	96	98	139	139	173	183		MZ51216
ET3455	102	108	183	209	255	255	96	100	209	215	125	125	90	98	131	137	179	179	MZ396483	MZ512155
ET3456	106	122	171	201	255	257	96	100	209	211	125	125	92	92	131	137	171	175	MZ396484
ET3457	126	128	181	209	257	259	96	100	209	215	125	139	92	98	131	137	175	179	MZ396485	MZ512156
ET3458	106	108	179	181	257	261	96	100	211	213	125	125	92	92	131	137	173	183
T6335	106	106	175	175	257	259	100	100	209	215	125	125	90	92	139	139	179	181	MZ396482	MZ512157
T6336	110	128	0	0	261	261	100	100	209	217	139	139	90	92	139	139	171	175
ECOSC-TEJ 1320	0	0	163	183	256	258	100	100	0	0	133	135	92	94	140	140	175	179
ECOSC-TEJ 1643	0	0	183	203	256	258	100	100	0	0	125	125	90	92	138	138	173	175
T6328	106	122	181	191	257	261	100	100	209	209	125	125	92	92	139	139	175	183	MZ396503	MZ512163
ECOSC-TEJ 460	119	119	183	191	258	262	100	100	209	211	117	125	90	90	138	138	173	177	MZ396505
ECOSC-TEJ 461	0	0	0	0	256	256	100	100	0	0	123	127	90	98	138	138	173	177	MZ396506
ECOSC-TEJ 462	121	127	195	195	262	262	100	100	213	213	121	127	90	92	0	0	175	179	MZ396507
ECOSC-TEJ 463	0	0	181	191	260	260	100	100	209	209	127	127	90	92	0	0	175	179	MZ396508
ET3460	106	126	177	209	257	259	100	100	209	211	125	143	90	92	131	137	177	183
ET3461	110	130	181	181	259	259	96	100	215	215	125	125	90	92	131	137	175	179		MZ512158
ET3462	106	110	171	183	255	259	96	100	209	215	121	139	90	92	131	137	167	167	MZ396496
ET3463	106	126	177	195	255	259	96	100	211	215	125	139	90	90	131	137	175	179		MZ512159
ET3464	108	128	169	179	257	257	96	100	209	215	119	139	90	90	131	137	175	179	MZ396497
ET3473	106	106	169	175	257	259	96	100	211	217	125	139	90	102	131	137	173	173	MZ396502	MZ512162
T2297	105	105	185	211	258	258	100	100	0	0	123	125	90	92	132	138	167	179
T2221	0	0	181	203	256	256	100	100	0	0	0	0	96	98	140	140	179	185	MZ396489
T2293	105	105	173	183	260	260	100	100	215	215	125	129	92	98	138	138	177	183
T2294	105	111	181	193	256	256	100	100	0	0	135	135	90	90	140	140	185	185
T2295	109	125	173	183	258	260	100	100	209	211	0	0	90	90	0	0	173	175	MZ396491
T6225	108	108	175	181	257	259	100	100	215	215	139	143	96	98	139	139	173	173	MZ396517	MZ512170
T6235	122	126	173	183	257	261	100	108	215	217	125	143	94	96	139	139	177	183		MZ512173
T6236	108	110	171	175	261	261	100	100	209	209	125	125	92	102	137	139	179	179
T6270	108	122	181	181	257	257	100	108	215	215	125	125	92	96	139	139	167	175
T6271	106	126	173	191	257	261	100	100	213	215	119	119	92	98	139	149	179	183
T6272	126	128	173	179	257	257	100	104	213	217	125	125	96	98	139	139	167	175		MZ512165
T6274	106	128	179	181	259	261	100	100	215	215	125	125	90	96	137	139	173	177		MZ512166
T6279	106	108	175	175	257	259	100	108	209	209	125	125	92	96	131	139	173	179
T6280	106	108	173	181	259	261	100	100	209	215	125	129	90	92	0	0	175	175	MZ396518	MZ512167
T6281	126	126	177	177	257	259	100	100	209	215	125	125	90	92	139	139	173	177	MZ396518	MZ512169
T6282	106	106	181	197	257	259	100	100	209	209	125	125	90	92	139	139	177	179	MZ396516	MZ512171
T6242	108	128	173	197	257	261	100	100	209	217	125	137	90	92	137	139	173	175	MZ396514
T6244	106	108	167	173	257	261	100	100	209	213	125	139	92	92	139	139	187	201	MZ396511	MZ512174
T6245	108	122	169	183	257	261	100	100	209	209	121	125	90	90	137	139	173	179
T6246	108	126	181	209	259	261	100	104	209	215	125	135	90	96	137	139	175	175
T6250	122	128	173	181	261	261	100	100	209	215	125	139	90	90	137	139	167	173	MZ396512
T6251	126	128	173	175	261	261	100	100	211	215	119	121	94	96	137	139	173	173
T6238	106	106	173	179	257	261	100	100	209	209	125	133	92	92	139	139	179	179
T6239	106	122	179	187	257	257	100	100	211	215	119	139	96	98	139	139	169	175	MZ396513
T6252	106	128	169	193	261	261	100	100	209	217	125	125	96	98	137	139	175	179	MZ396515	MZ512172
T6254	106	128	181	185	257	261	100	108	211	211	125	137	90	96	139	139	179	183
T6255	106	106	173	195	257	257	100	100	209	215	125	125	90	92	137	139	175	177	MZ396521	MZ512177
T6275	106	122	173	181	257	261	100	100	209	217	125	139	92	92	137	139	177	183	MZ396520	MZ512178
T6284	122	126	179	191	261	261	100	100	211	215	125	139	90	94	137	139	181	181
T6285	128	128	173	179	259	259	100	108	209	209	119	125	90	98	137	139	175	179
T6286	108	110	179	185	261	261	100	100	209	215	117	125	96	96	137	139	175	179
T6287	126	126	173	173	257	259	100	100	209	217	125	125	90	92	137	139	175	177	MZ396522	MZ512175
T6288	126	126	173	175	261	261	100	100	211	215	125	125	90	92	139	139	175	181	MZ396523	MZ512176
T6331	106	106	175	201	257	257	100	100	209	209	123	125	90	96	139	139	181	183

## Sheet: Table S4
Table S4. Linkage disequilibrium results of nine microsatellite from Centropomus undecimalis
Locus	Chi2	df	P-Value
Cun21A-Cun06	21.3323	16	0.16609
Cun20-Cun10A	6.28299	4	0.178988
Cun10A-Cun04A	6.2691	4	0.179933
Cun10A-Cun14	5.08021	4	0.279166
Cun02-Cun06	17.0663	16	0.381323
Cun01-Cun021B	13.9162	14	0.455971
Cun02-Cun21A	19.6034	20	0.482973
Cun21A-Cun021B	17.2652	18	0.504945
Cun10A-Cun21A	2.60604	4	0.625754
Cun06-Cun14	7.92763	10	0.635906
Cun01-Cun14	7.57855	10	0.669928
Cun21A-Cun04A	10.6498	14	0.713301
Cun04A-Cun14	8.81732	12	0.71845
Cun21B-Cun14	8.625	12	0.734582
Cun10A-Cun21B	3.25418	6	0.776334
Cun20-Cun14	5.36575	10	0.865445
Cun20-Cun01	6.69447	12	0.877126
Cun21A-Cun14	6.60797	12	0.882397
Cun02-Cun04A	8.05131	14	0.886635
Cun21B-Cun06	11.1525	18	0.887774
Cun20-Cun21A	9.3908	16	0.896451
Cun20-Cun21B	7.52773	14	0.912452
Cun20-Cun04A	3.92967	10	0.950464
Cun02-Cun21B	9.17755	18	0.955487
Cun20-Cun02	5.92672	14	0.968305
Cun04A-Cun06	4.65919	12	0.968405
Cun04A-Cun21B	6.85171	16	0.976014
Cun01-Cun06	4.9181	14	0.98692
Cun04A-Cun01	3.05972	12	0.995108
Cun21A-Cun01	4.88433	16	0.996299
Cun20-Cun06	1.83735	10	0.997442
Cun02-Cun14	2.37725	12	0.99857
Cun02-Cun01	1.671	16	0.999997
Cun10A-Cun02	0	4	1
Cun10A-Cun01	0	2	1
Cun10A-Cun06	0	2	1

## Sheet: Table S5
Table S5. BayesASS results showing the average migration rate (mprom) by cluster obtained with DAPC (k=3) and STRUCTURE (k=2, k=3). (SD) standard deviation, (CI) 95% confidence intervals (N) indicates the number of times this outcome was reached over 10 runs with varying starting seeds.
Genetic cluster by analysis	mprom	SD	CI 95%	Min	Max	N
DAPC
m (k=2) (k=2)	0.9159	9.7182e-05	6.02333e-05	0.91601	0.91589	9
m (k=3) (k=2)	0.0254	6.6666e-05	4.13197e-05	0.0254413	0.0253587	8
m (k=1) (k=2)	0.009	6.992e-05	4.33364e-05	0.00908334	0.00899666	6
m (k=2) (k=3)	0.042	0.0001523	9.44496e-05	0.0421045	0.0419156	6
m (k=3) (k=3)	0.9501	0.0001699	0.000105345	0.950205	0.949995	7
m (k=1) (k=3)	0.0164	0.0001897	0.000117598	0.0165776	0.0163424	6
m (k=2) (k=1)	0.042	0.0001649	0.000102261	0.0421523	0.0419477	7
m (k=3) (k=1)	0.0244	0.0001159	7.18653e-05	0.0245419	0.0243981	7
m (k=1) (k=1)	0.9745	0.0001813	0.000112402	0.974632	0.974408	6
STRUCTURE
K=2
m (k=2) (k=2)	0.9166	0.000141421	8.76523e-05	0.916688	0.916512	9
m (k=1) (k=2)	0.01161	3.16228e-05	1.95996e-05	0.0116296	0.0115904	9
m (k=2) (k=1)	0.0834	0.000141421	8.76523e-05	0.0834877	0.0833123	6
m (k=1) (k=1)	0.98839	3.16228e-05	1.95996e-05	0.98841	0.98837	10
STRUCTURE
K=3
m (k=2) (k=2)	0.88829	0.000166333	0.000103092	0.888393	0.888187	7
m (k=3) (k=2)	0.02753	6.74949e-05	4.1833e-05	0.0275718	0.0274882	8
m (k=1) (k=2)	0.00872	4.21637e-05	2.61329e-05	0.00874613	0.00869387	8
m (k=2) (k=3)	0.03719	0.000137032	8.49318e-05	0.0372749	0.0371051	4
m (k=3) (k=3)	0.92904	0.0257696	0.0159719	0.945012	0.913068	9
m (k=1) (k=3)	0.03545	0.00174436	0.00108114	0.0365311	0.0343689	8
m (k=2) (k=1)	0.07456	0.000177639	0.0001101	0.0746701	0.0744499	5
m (k=3) (k=1)	0.04342	0.0257486	0.0159588	0.0593788	0.0274612	9
m (k=1) (k=1)	0.95581	0.00176034	0.00109105	0.956901	0.954719	8

## Sheet: Table S6
Table S6. Results of 10 runs of the BayesAss algorithm, with average and total number of times the results was archieved
Modelos BayesAss DAPC
Repetición
1	m[0][0]:	0.9160(0.0486)	m[0][1]:	0.0418(0.0370)	m[0][2]:	0.0421(0.0372)	D_k2	Fstat:	0.1037(0.0663)
Seed: 767	m[1][0]:	0.0254(0.0170)	m[1][1]:	0.9500(0.0258)	m[1][2]:	0.0246(0.0206)	D_k3	Fstat:	0.0310(0.0226)
	m[2][0]:	0.0089(0.0087)	m[2][1]:	0.0166(0.0142)	m[2][2]:	0.9745(0.0164)	D_k1	Fstat:	0.0569(0.0295)
2	m[0][0]:	0.9160(0.0485)	m[0][1]:	0.0423(0.0373)	m[0][2]:	0.0417(0.0368)	D_k2	Fstat:	0.1049(0.0667)
Seed 268	m[1][0]:	0.0254(0.0169)	m[1][1]:	0.9501(0.0258)	m[1][2]:	0.0245(0.0204)	D_k3	Fstat:	0.0310(0.0226)
	m[2][0]:	0.0090(0.0088)	m[2][1]:	0.0164(0.0142)	m[2][2]:	0.9746(0.0164)	D_k1	Fstat:	0.0567(0.0295)
3	m[0][0]:	0.9160(0.0485)	m[0][1]:	0.0419(0.0370)	m[0][2]:	0.0421(0.0371)	D_k2	Fstat:	0.1048(0.0671)
Seed 433	m[1][0]:	0.0253(0.0169)	m[1][1]:	0.9503(0.0257)	m[1][2]:	0.0244(0.0205)	D_k3	Fstat:	0.0311(0.0227)
	m[2][0]:	0.0091(0.0088)	m[2][1]:	0.0168(0.0144)	m[2][2]:	0.9742(0.0166)	D_k1	Fstat:	0.0572(0.0296)
4	m[0][0]:	0.9160(0.0486)	m[0][1]:	0.0419(0.0370)	m[0][2]:	0.0421(0.0373)	D_k2	Fstat:	0.1051(0.0669)
Seed 175	m[1][0]:	0.0254(0.0169)	m[1][1]:	0.9501(0.0257)	m[1][2]:	0.0245(0.0205)	D_k3	Fstat:	0.0309(0.0226)
	m[2][0]:	0.0090(0.0088)	m[2][1]:	0.0164(0.0142)	m[2][2]:	0.9746(0.0164)	D_k1	Fstat:	0.0568(0.0295)
5	m[0][0]:	0.9157(0.0487)	m[0][1]:	0.0420(0.0371)	m[0][2]:	0.0423(0.0374)	D_k2	Fstat:	0.1043(0.0668)
Seed 212	m[1][0]:	0.0255(0.0171)	m[1][1]:	0.9497(0.0262)	m[1][2]:	0.0247(0.0210)	D_k3	Fstat:	0.0310(0.0227)
	m[2][0]:	0.0090(0.0088)	m[2][1]:	0.0165(0.0143)	m[2][2]:	0.9745(0.0165)	D_k1	Fstat:	0.0572(0.0296)
6	m[0][0]:	0.9160(0.0486)	m[0][1]:	0.0419(0.0370)	m[0][2]:	0.0422(0.0371)	D_k2	Fstat:	0.1047(0.0673)
Seed 555	m[1][0]:	0.0253(0.0170)	m[1][1]:	0.9502(0.0256)	m[1][2]:	0.0244(0.0204)	D_k3	Fstat:	0.0311(0.0226)
	m[2][0]:	0.0091(0.0088)	m[2][1]:	0.0164(0.0142)	m[2][2]:	0.9746(0.0164)	D_k1	Fstat:	0.0569(0.0295
7	m[0][0]:	0.9160(0.0485)	m[0][1]:	0.0421(0.0370)	m[0][2]:	0.0420(0.0370)	D_k2	Fstat:	0.1049(0.0672)
Seed 660	m[1][0]:	0.0254(0.0169)	m[1][1]:	0.9501(0.0257)	m[1][2]:	0.0245(0.0205)	D_k3	Fstat:	0.0311(0.0227)
	m[2][0]:	0.0091(0.0088)	m[2][1]:	0.0163(0.0140)	m[2][2]:	0.9746(0.0163)	D_k1	Fstat:	0.0567(0.0296)
8	m[0][0]:	0.9159(0.0484)	m[0][1]:	0.0420(0.0371)	m[0][2]:	0.0421(0.0371)	D_k2	Fstat:	0.1045(0.0669)
Seed 931	m[1][0]:	0.0254(0.0170)	m[1][1]:	0.9501(0.0256)	m[1][2]:	0.0244(0.0203)	D_k3	Fstat:	0.0309(0.0225)
	m[2][0]:	0.0090(0.0088)	m[2][1]:	0.0163(0.0141)	m[2][2]:	0.9747(0.0164)	D_k1	Fstat:	0.0569(0.0294)
9	m[0][0]:	0.9160(0.0485)	m[0][1]:	0.0420(0.0371)	m[0][2]:	0.0420(0.0370)	D_k2	Fstat:	0.1052(0.0673)
Seed 812	m[1][0]:	0.0255(0.0170)	m[1][1]:	0.9501(0.0257)	m[1][2]:	0.0244(0.0205)	D_k3	Fstat:	0.0310(0.0225)
	m[2][0]:	0.0091(0.0088)	m[2][1]:	0.0162(0.0140)	m[2][2]:	0.9747(0.0162)	D_k1	Fstat:	0.0567(0.0293)
10	m[0][0]:	0.9159(0.0485)	m[0][1]:	0.0422(0.0370)	m[0][2]:	0.0419(0.0371)	D_k2	Fstat:	0.1049(0.0673)
seed 965	m[1][0]:	0.0254(0.0170)	m[1][1]:	0.9503(0.0258)	m[1][2]:	0.0243(0.0205)	D_k3	Fstat:	0.0310(0.0227)
	m[2][0]:	0.0091(0.0088)	m[2][1]:	0.0167(0.0143)	m[2][2]:	0.9742(0.0166)	D_k1	Fstat:	0.0569(0.0295)
Modelos BayesAss Structure k3
Repetición
1	m[0][0]:	0.8883(0.0500)	m[0][1]:	0.0373(0.0334)	m[0][2]:	0.0744(0.0440)	E_k2	Fstat:	0.1046(0.0670)
Seed: 767	m[1][0]:	0.0277(0.0184)	m[1][1]:	0.9370(0.0288)	m[1][2]:	0.0353(0.0238)	E_k3	Fstat:	0.0402(0.0274)
	m[2][0]:	0.0087(0.0085)	m[2][1]:	0.0362(0.0214)	m[2][2]:	0.9550(0.0227)	E_k1	Fstat:	0.0519(0.0292)
2	m[0][0]:	0.8885(0.0498)	m[0][1]:	0.0370(0.0331)	m[0][2]:	0.0745(0.0441)	E_k2	Fstat:	0.1050(0.0671)
Seed 268	m[1][0]:	0.0275(0.0183)	m[1][1]:	0.9372(0.0287)	m[1][2]:	0.0353(0.0237)	E_k3	Fstat:	0.0399(0.0274)
	m[2][0]:	0.0087(0.0085)	m[2][1]:	0.0353(0.0212)	m[2][2]:	0.9560(0.0225)	E_k1	Fstat:	0.0513(0.0288)
3	m[0][0]:	0.8883(0.0501)	m[0][1]:	0.0373(0.0333)	m[0][2]:	0.0745(0.0443)	E_k2	Fstat:	0.1051(0.0672)
Seed 433	m[1][0]:	0.0275(0.0183)	m[1][1]:	0.9371(0.0286)	m[1][2]:	0.0354(0.0238)	E_k3	Fstat:	0.0399(0.0273)
	m[2][0]:	0.0087(0.0085)	m[2][1]:	0.0356(0.0212)	m[2][2]:	0.9557(0.0225)	E_k1	Fstat:	0.0517(0.0291)
4	m[0][0]:	0.8882(0.0501)	m[0][1]:	0.0372(0.0334)	m[0][2]:	0.0746(0.0442)	E_k2	Fstat:	0.1043(0.0670)
Seed 175	m[1][0]:	0.0275(0.0183)	m[1][1]:	0.9373(0.0286)	m[1][2]:	0.0352(0.0237)	E_k3	Fstat:	0.0398(0.0273)
	m[2][0]:	0.0087(0.0085)	m[2][1]:	0.0362(0.0215)	m[2][2]:	0.9550(0.0228)	E_k1	Fstat:	0.0519(0.0290)
5	m[0][0]:	0.8882(0.0500)	m[0][1]:	0.0371(0.0333)	m[0][2]:	0.0747(0.0441)	E_k2	Fstat:	0.1044(0.0668)
Seed 212	m[1][0]:	0.0276(0.0183)	m[1][1]:	0.8557(0.1222)	m[1][2]:	0.1167(0.1219)	E_k3	Fstat:	0.1846(0.2690)
WeirdTraceFile	m[2][0]:	0.0088(0.0085)	m[2][1]:	0.0306(0.0204)	m[2][2]:	0.9607(0.0218)	E_k1	Fstat:	0.0508(0.0286)
6	m[0][0]:	0.8883(0.0502)	m[0][1]:	0.0370(0.0330)	m[0][2]:	0.0748(0.0444)	E_k2	Fstat:	0.1050(0.0672)
Seed 555	m[1][0]:	0.0275(0.0184)	m[1][1]:	0.9370(0.0290)	m[1][2]:	0.0355(0.0241)	E_k3	Fstat:	0.0402(0.0277)
	m[2][0]:	0.0087(0.0085)	m[2][1]:	0.0367(0.0216)	m[2][2]:	0.9546(0.0229)	E_k1	Fstat:	0.0520(0.0292)
7	m[0][0]:	0.8883(0.0498)	m[0][1]:	0.0371(0.0332)	m[0][2]:	0.0747(0.0440)	E_k2	Fstat:	0.1046(0.0667)
Seed 660	m[1][0]:	0.0275(0.0183)	m[1][1]:	0.9371(0.0288)	m[1][2]:	0.0354(0.0238)	E_k3	Fstat:	0.0399(0.0274)
	m[2][0]:	0.0087(0.0085)	m[2][1]:	0.0360(0.0215)	m[2][2]:	0.9553(0.0227)	E_k1	Fstat:	0.0517(0.0290)
8	m[0][0]:	0.8880(0.0499)	m[0][1]:	0.0374(0.0333)	m[0][2]:	0.0747(0.0440)	E_k2	Fstat:	0.1057(0.0672)
Seed 931	m[1][0]:	0.0275(0.0183)	m[1][1]:	0.9375(0.0285)	m[1][2]:	0.0349(0.0235)	E_k3	Fstat:	0.0396(0.0271)
	m[2][0]:	0.0088(0.0085)	m[2][1]:	0.0359(0.0213)	m[2][2]:	0.9553(0.0226)	E_k1	Fstat:	0.0516(0.0289)
9	m[0][0]:	0.8882(0.0501)	m[0][1]:	0.0373(0.0333)	m[0][2]:	0.0745(0.0441)	E_k2	Fstat:	0.1048(0.0669)
Seed 812	m[1][0]:	0.0275(0.0184)	m[1][1]:	0.9374(0.0287)	m[1][2]:	0.0351(0.0237)	E_k3	Fstat:	0.0399(0.0272)
	m[2][0]:	0.0087(0.0085)	m[2][1]:	0.0359(0.0213)	m[2][2]:	0.9553(0.0226)	E_k1	Fstat:	0.0517(0.0291)
10	m[0][0]:	0.8886(0.0500)	m[0][1]:	0.0372(0.0331)	m[0][2]:	0.0742(0.0441)	E_k2	Fstat:	0.1050(0.0669)
seed 965	m[1][0]:	0.0275(0.0183)	m[1][1]:	0.9371(0.0288)	m[1][2]:	0.0354(0.0239)	E_k3	Fstat:	0.0397(0.0272)
	m[2][0]:	0.0087(0.0085)	m[2][1]:	0.0361(0.0213)	m[2][2]:	0.9552(0.0225)	E_k1	Fstat:	0.0518(0.0290)
Modelos BayesAss Structure k2
Repetición
1	m[0][0]:	0.9168(0.0480)	m[0][1]:	0.0832(0.0480)		E_k2	Fstat:	0.1044(0.0664)
Seed: 767	m[1][0]:	0.0116(0.0080)	m[1][1]:	0.9884(0.0080)		E_k1	Fstat:	0.0497(0.0218)
2	m[0][0]:	0.9166(0.0481)	m[0][1]:	0.0834(0.0481)		E_k2	Fstat:	0.1040(0.0666)
Seed 268	m[1][0]:	0.0116(0.0080)	m[1][1]:	0.9884(0.0080)		E_k1	Fstat:	0.0497(0.0218)
3	m[0][0]:	0.9166(0.0481)	m[0][1]:	0.0834(0.0481)		E_k2	Fstat:	0.1044(0.0669)
Seed 433	m[1][0]:	0.0116(0.0080)	m[1][1]:	0.9884(0.0080)		E_k1	Fstat:	0.0498(0.0218)
4	m[0][0]:	0.9166(0.0482)	m[0][1]:	0.0834(0.0482)		E_k2	Fstat:	0.1041(0.0666)
Seed 175	m[1][0]:	0.0116(0.0080)	m[1][1]:	0.9884(0.0080)		E_k1	Fstat:	0.0498(0.0218)
5	m[0][0]:	0.9165(0.0482)	m[0][1]:	0.0835(0.0482)		E_k2	Fstat:	0.1038(0.0664)
Seed 212	m[1][0]:	0.0116(0.0080)	m[1][1]:	0.9884(0.0080)		E_k1	Fstat:	0.0497(0.0218)
6	m[0][0]:	0.9166(0.0482)	m[0][1]:	0.0834(0.0482)		E_k2	Fstat:	0.1044(0.0666)
Seed 555	m[1][0]:	0.0116(0.0080)	m[1][1]:	0.9884(0.0080)		E_k1	Fstat:	0.0498(0.0218)
7	m[0][0]:	0.9168(0.0483)	m[0][1]:	0.0832(0.0483)		E_k2	Fstat:	0.1043(0.0664)
Seed 660	m[1][0]:	0.0116(0.0080)	m[1][1]:	0.9884(0.0080)		E_k1	Fstat:	0.0496(0.0217)
8	m[0][0]:	0.9163(0.0482)	m[0][1]:	0.0837(0.0482)		E_k2	Fstat:	0.1040(0.0666)
Seed 931	m[1][0]:	0.0117(0.0080)	m[1][1]:	0.9883(0.0080)		E_k1	Fstat:	0.0496(0.0218)
9	m[0][0]:	0.9166(0.0480)	m[0][1]:	0.0834(0.0480)		E_k2	Fstat:	0.1039(0.0666)
Seed 812	m[1][0]:	0.0116(0.0080)	m[1][1]:	0.9884(0.0080)		E_k1	Fstat:	0.0497(0.0218)
10	m[0][0]:	0.9166(0.0483)	m[0][1]:	0.0834(0.0483)		E_k2	Fstat:	0.1045(0.0667)
seed 965	m[1][0]:	0.0116(0.0080)	m[1][1]:	0.9884(0.0080)		E_k1	Fstat:	0.0497(0.0218)
