# Supplementary material
Source: MDPI journal article supplement (https://www.mdpi.com/1424-2818/13/8/347)
Supplement: s1 [file s1 › suplementary material 2 .pdf]

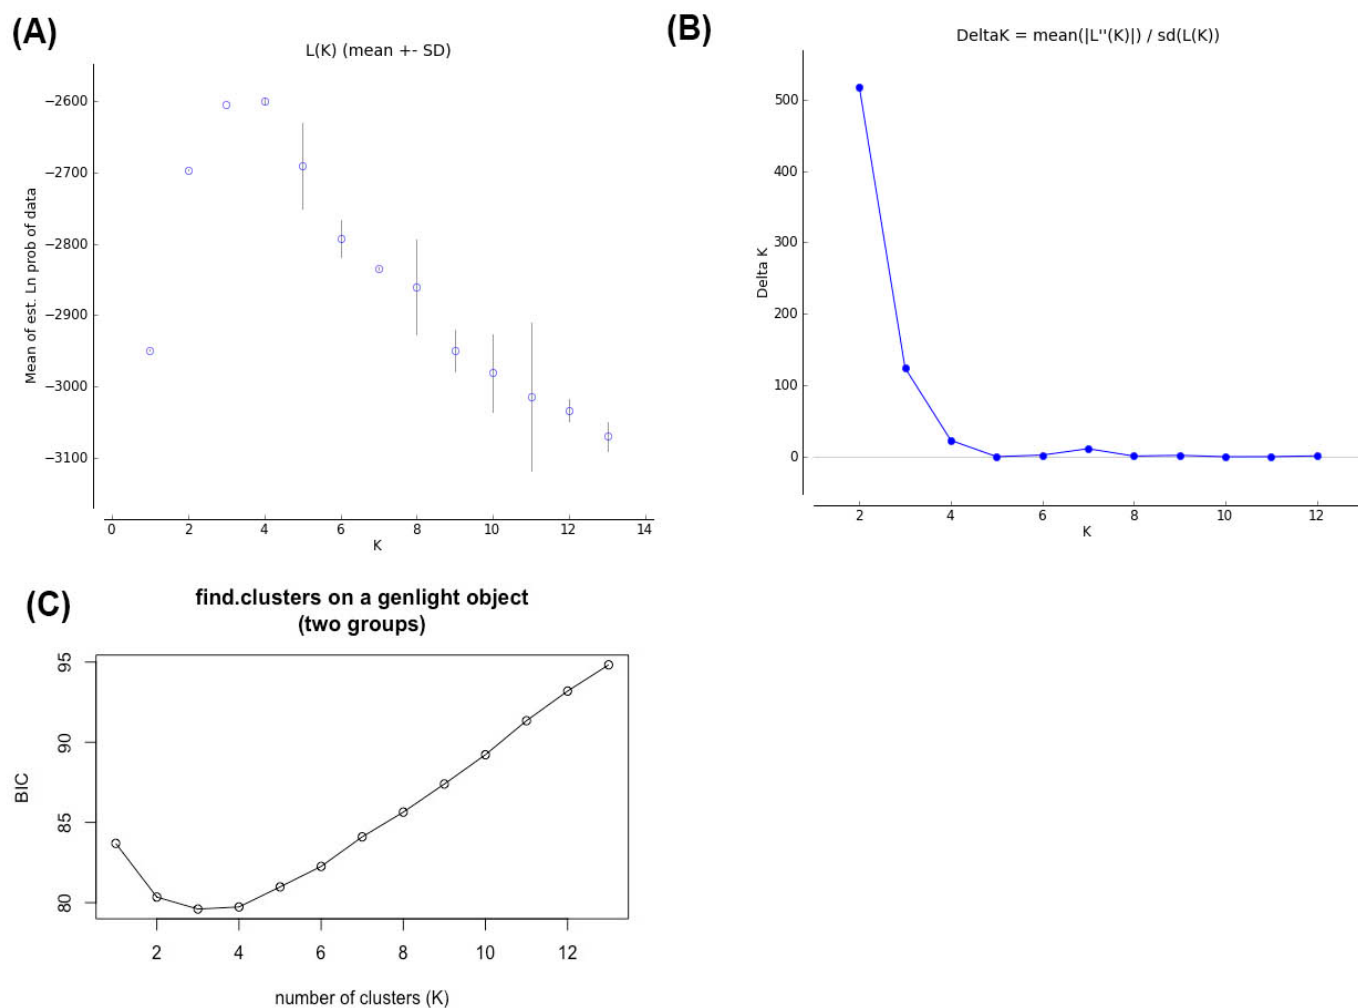

Supplementary material 2. Plots generated in STRUCTURE Harvester and DAPC. (A) the mean log likelihood of the data  $[L(K)]$  and (B) Estimation of population clustering level from seven microsatellite genotypes following Evanno et al. (2005) (C) BIC values change (*find.clusters* function) of DAPC.
