# Supplementary material
Source: MDPI journal article supplement (https://www.mdpi.com/1424-2818/13/8/347)
Supplement: s1 [file s1 › suplementary material 3.pdf]

**A**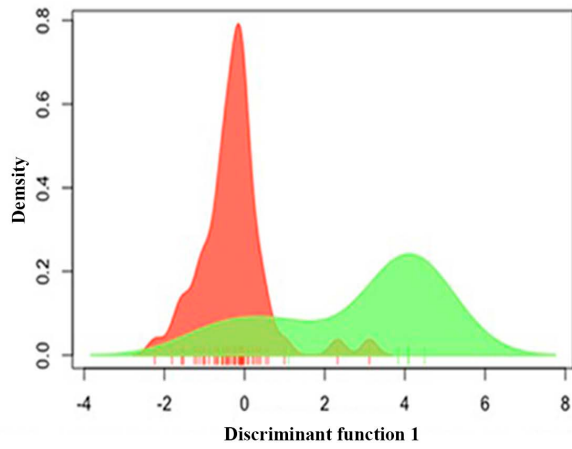**B**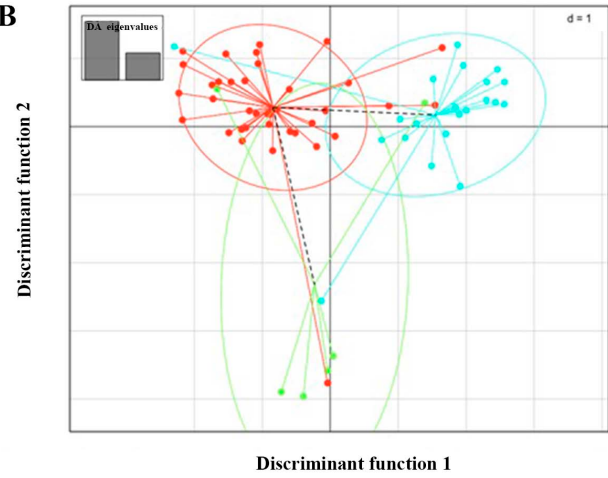

Supplementary material 3. Discriminant analysis of principal components (DAPC)  
Scatterplots of the discriminant analysis of principal components of the microsatellite data  
for 3 zones (A) k=2 (B) k=3
